# Supplementary material
Source: publisher site journal article supplement (https://www.dovepress.com/article/394957)
Supplement: Supplementary file 1 [file get_supplementary_file.php]

**Supplementary materials**


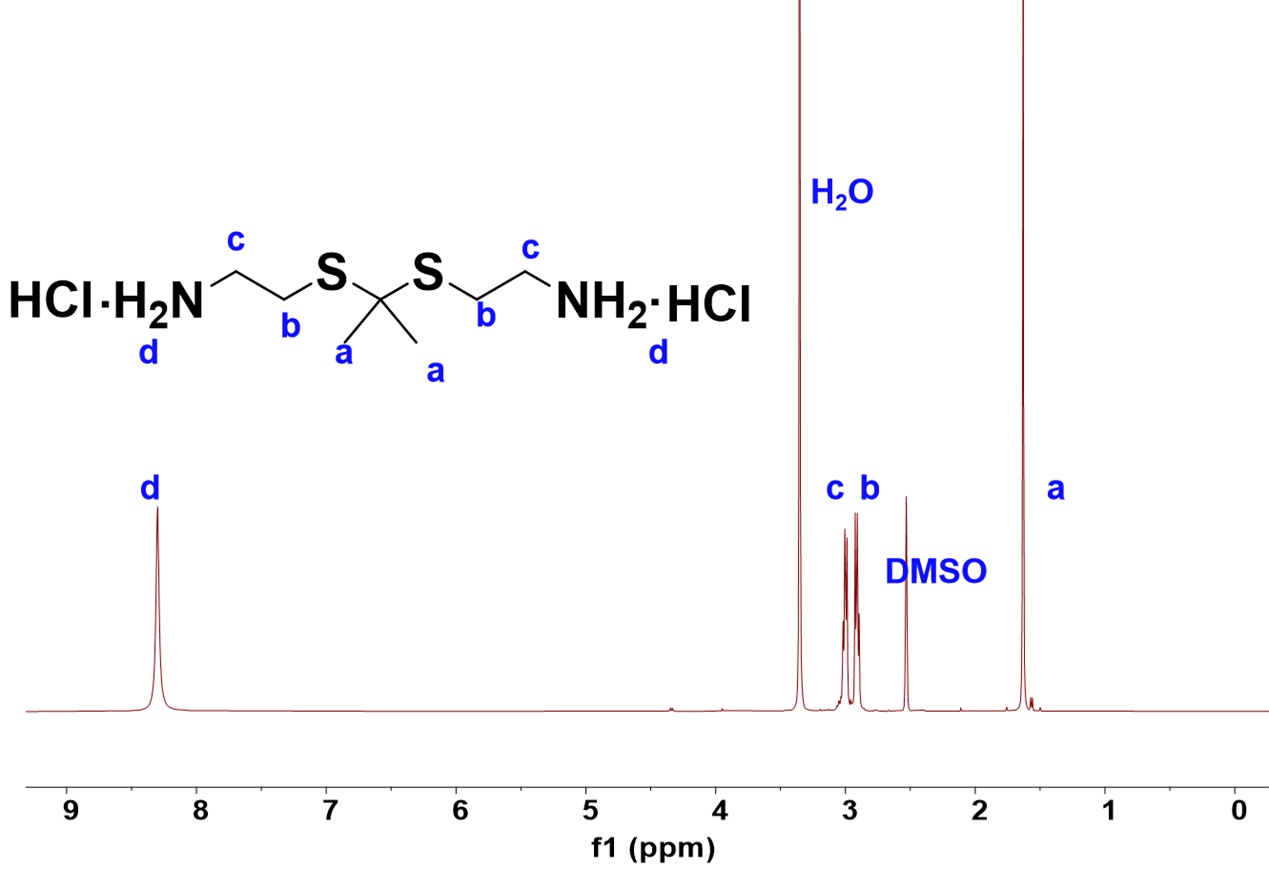


**Figure S1.** 1H NMR spectrum of thioketal (TK) in DMSO-*d*6.


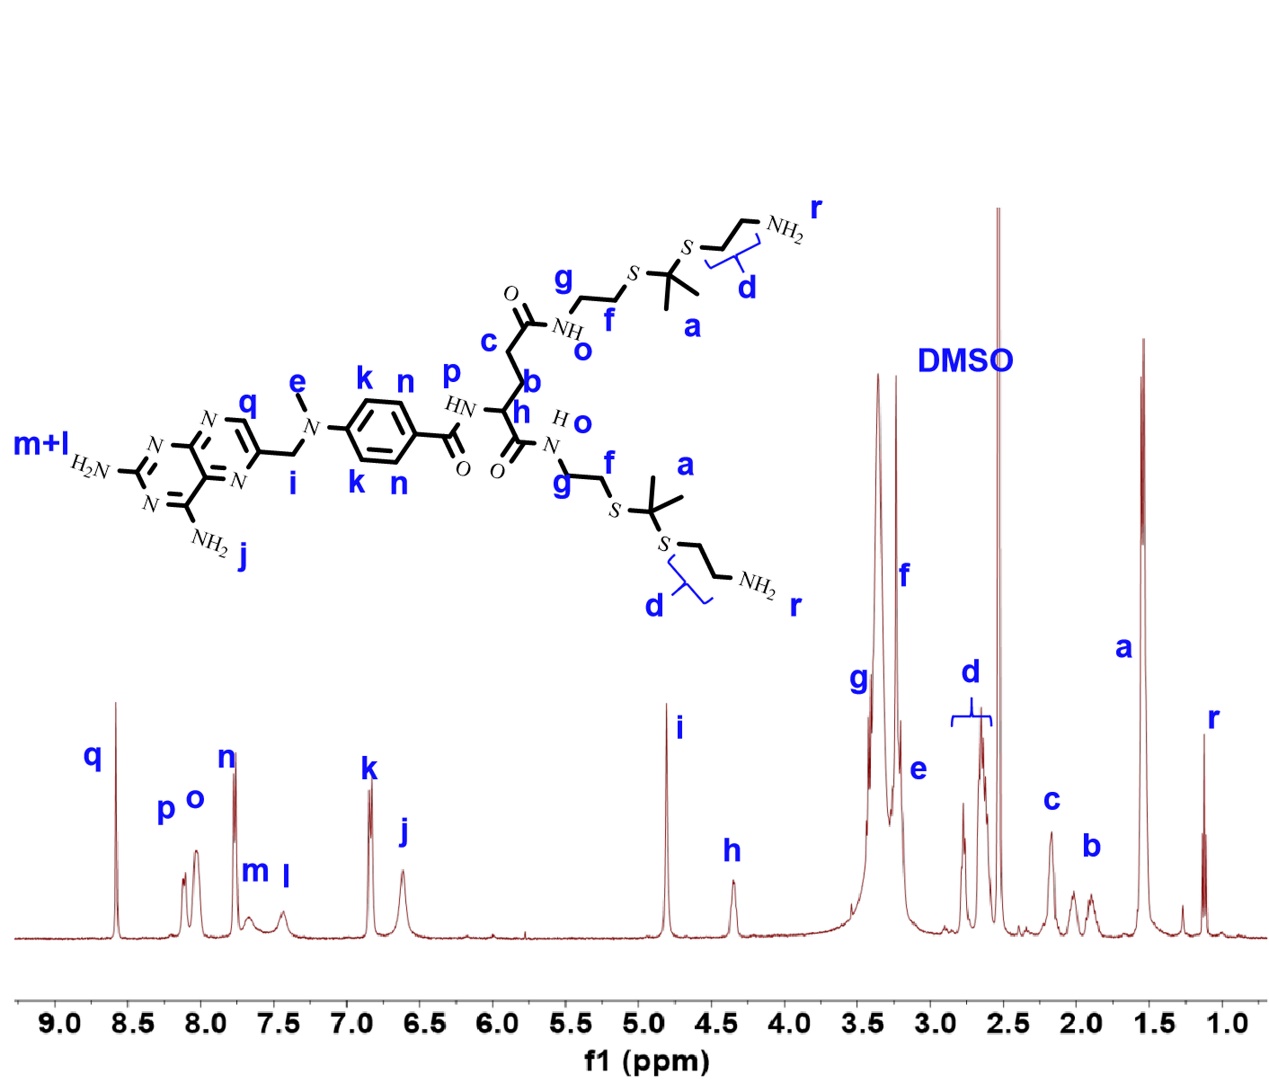


**Figure S2.** 1H NMR spectrum of MTX-TK in DMSO-*d*6.


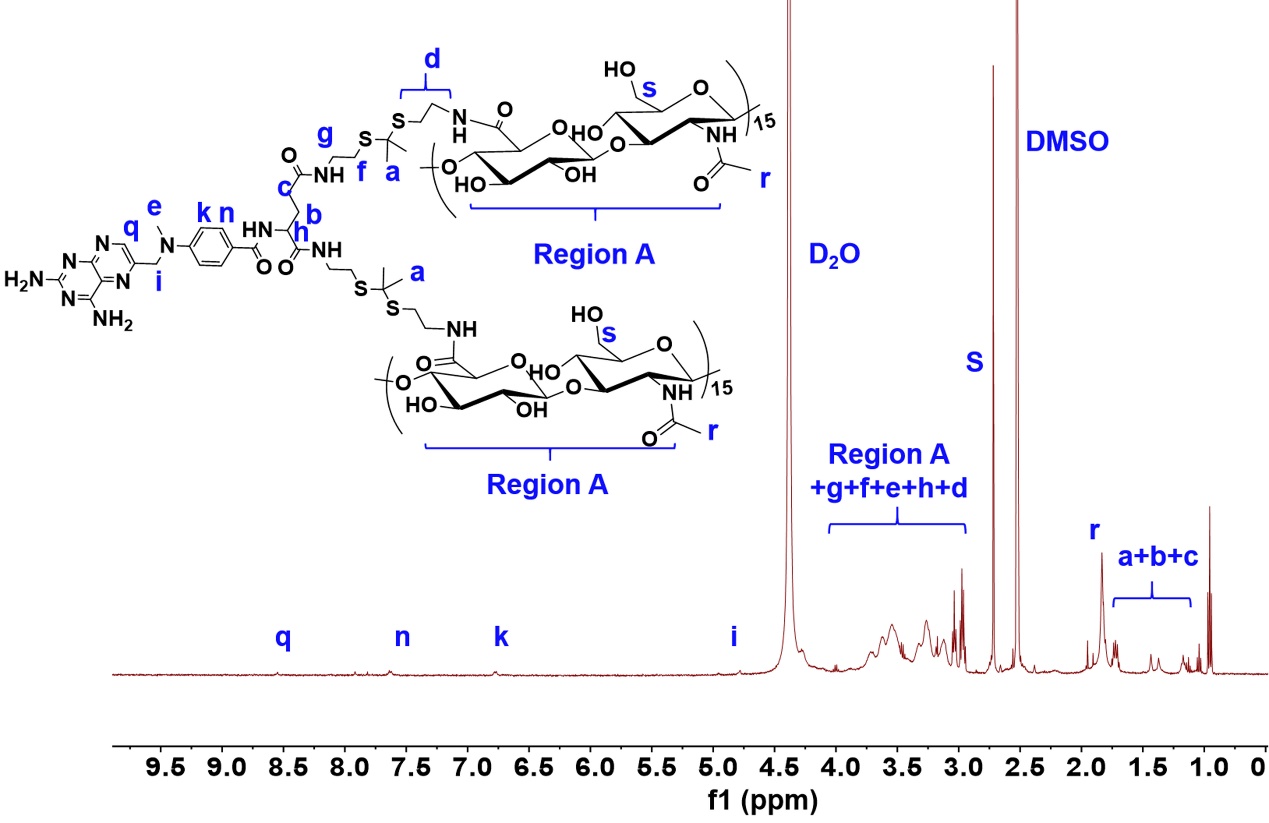


**Figure S3.** 1H NMR spectrum of MTX-TK-HA in D2O and DMSO-*d*6 (1:1, v/v).


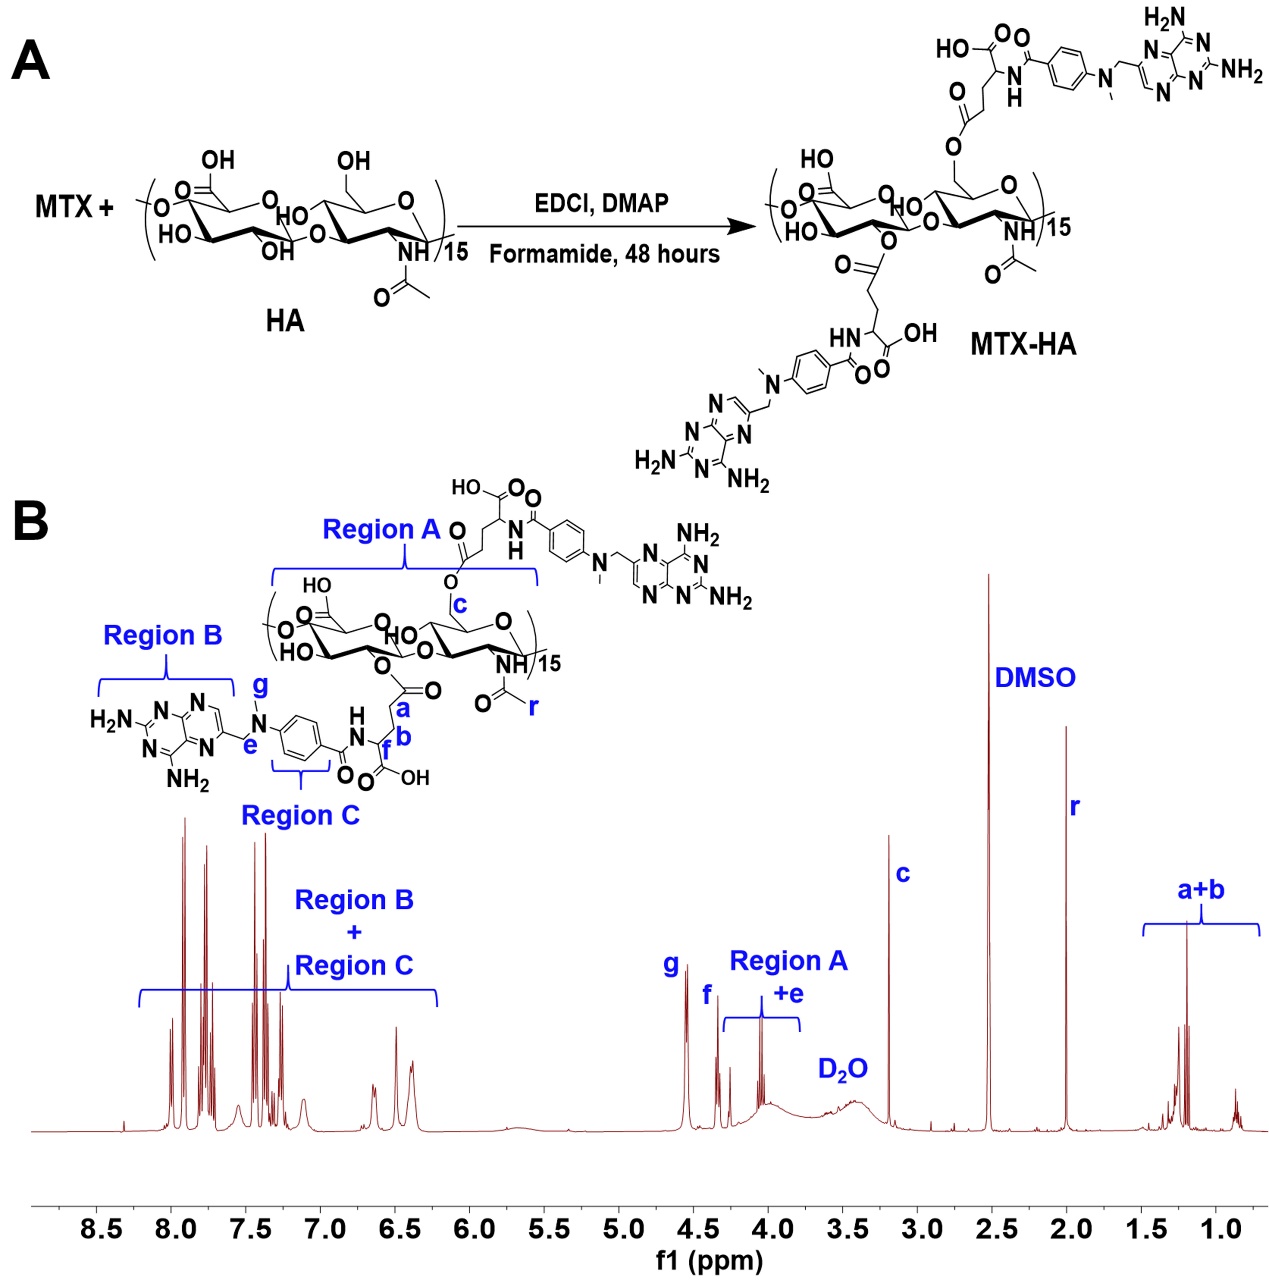


**Figure S4.** (**A**) Synthesis scheme for MTX-HA. (**B**) 1H NMR spectrum of MTX-HA in D2O and DMSO-*d*6 (1:2, v/v).


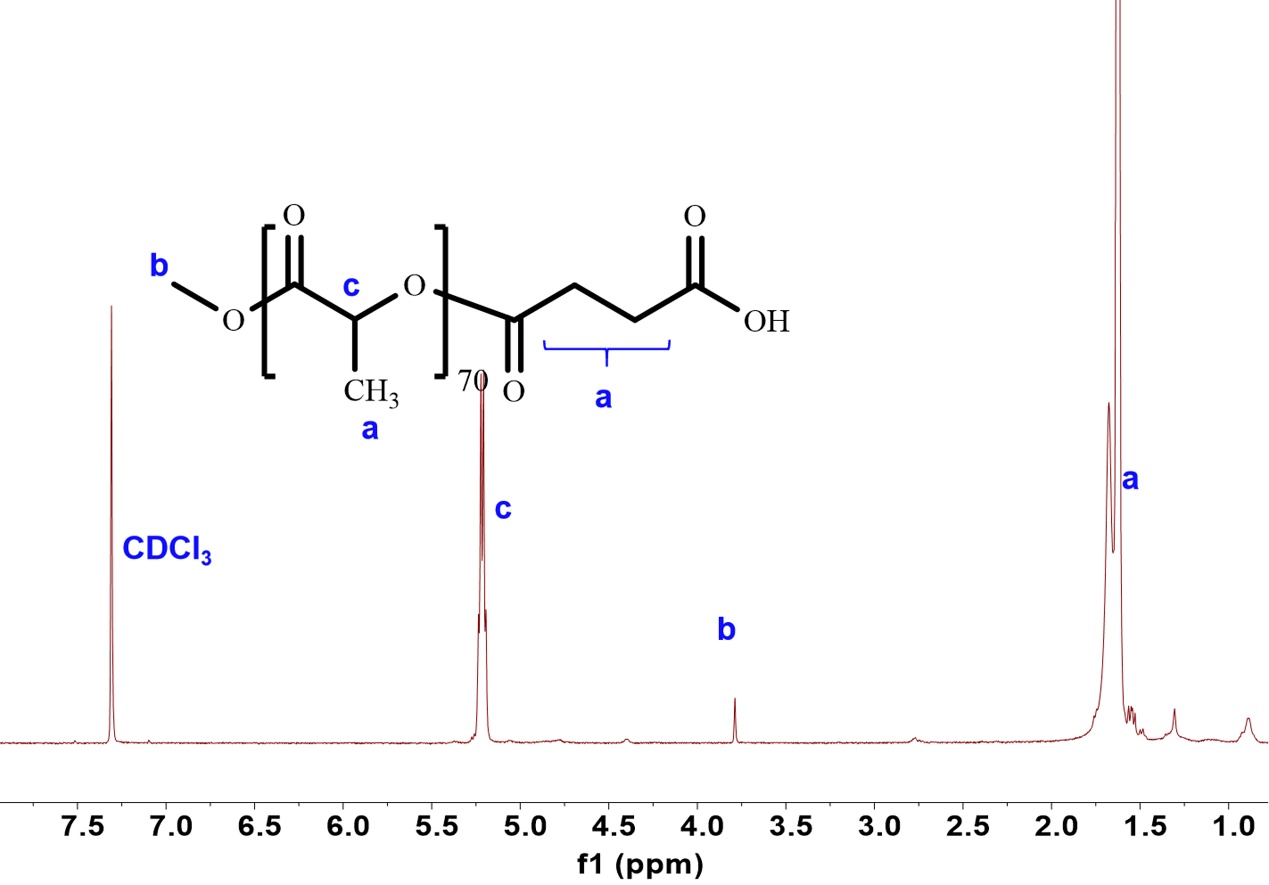


**Figure S5.** 1H NMR spectrum of PLA-COOH in CDCl3-*d6*.


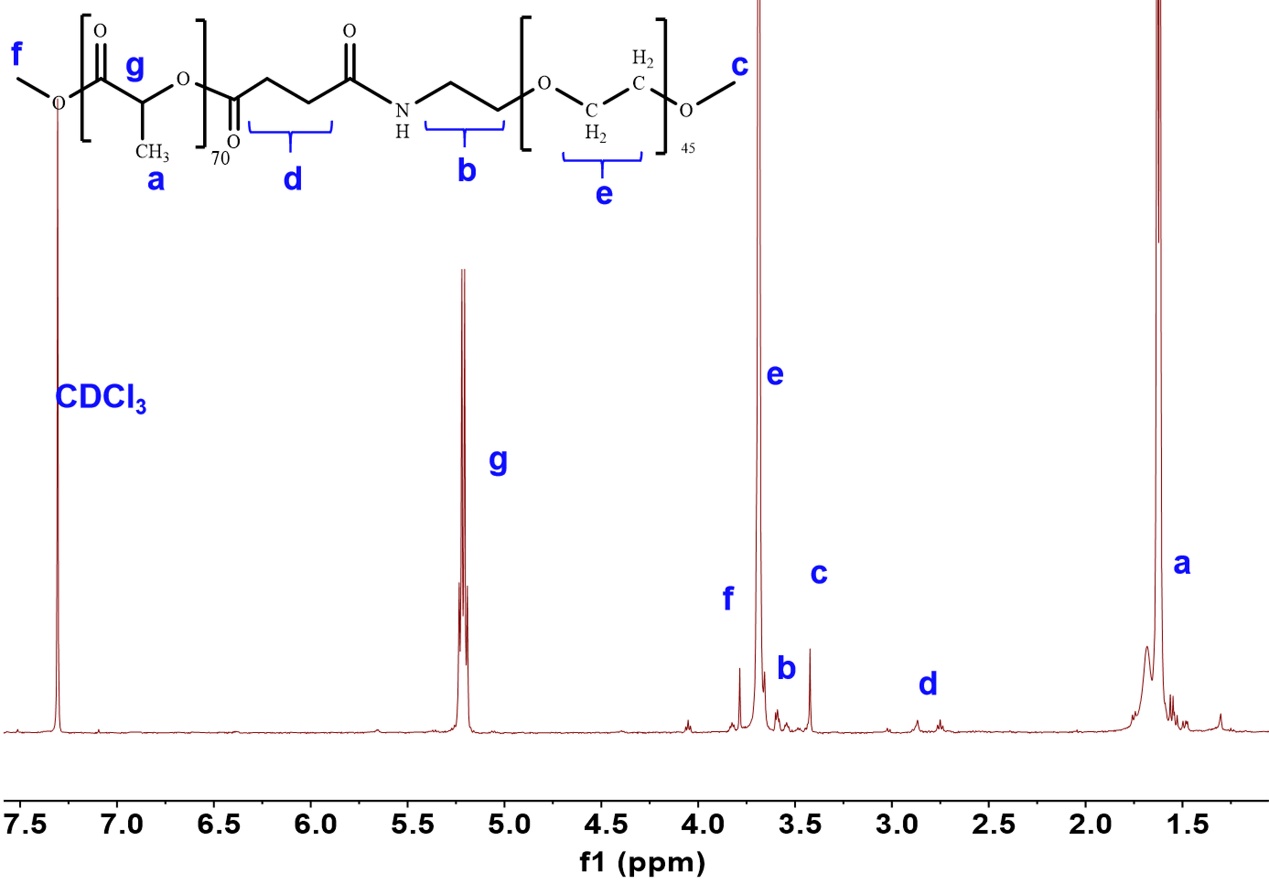


**Figure S6.** 1H NMR spectrum of PLA-mPEG in CDCl3-*d6*.


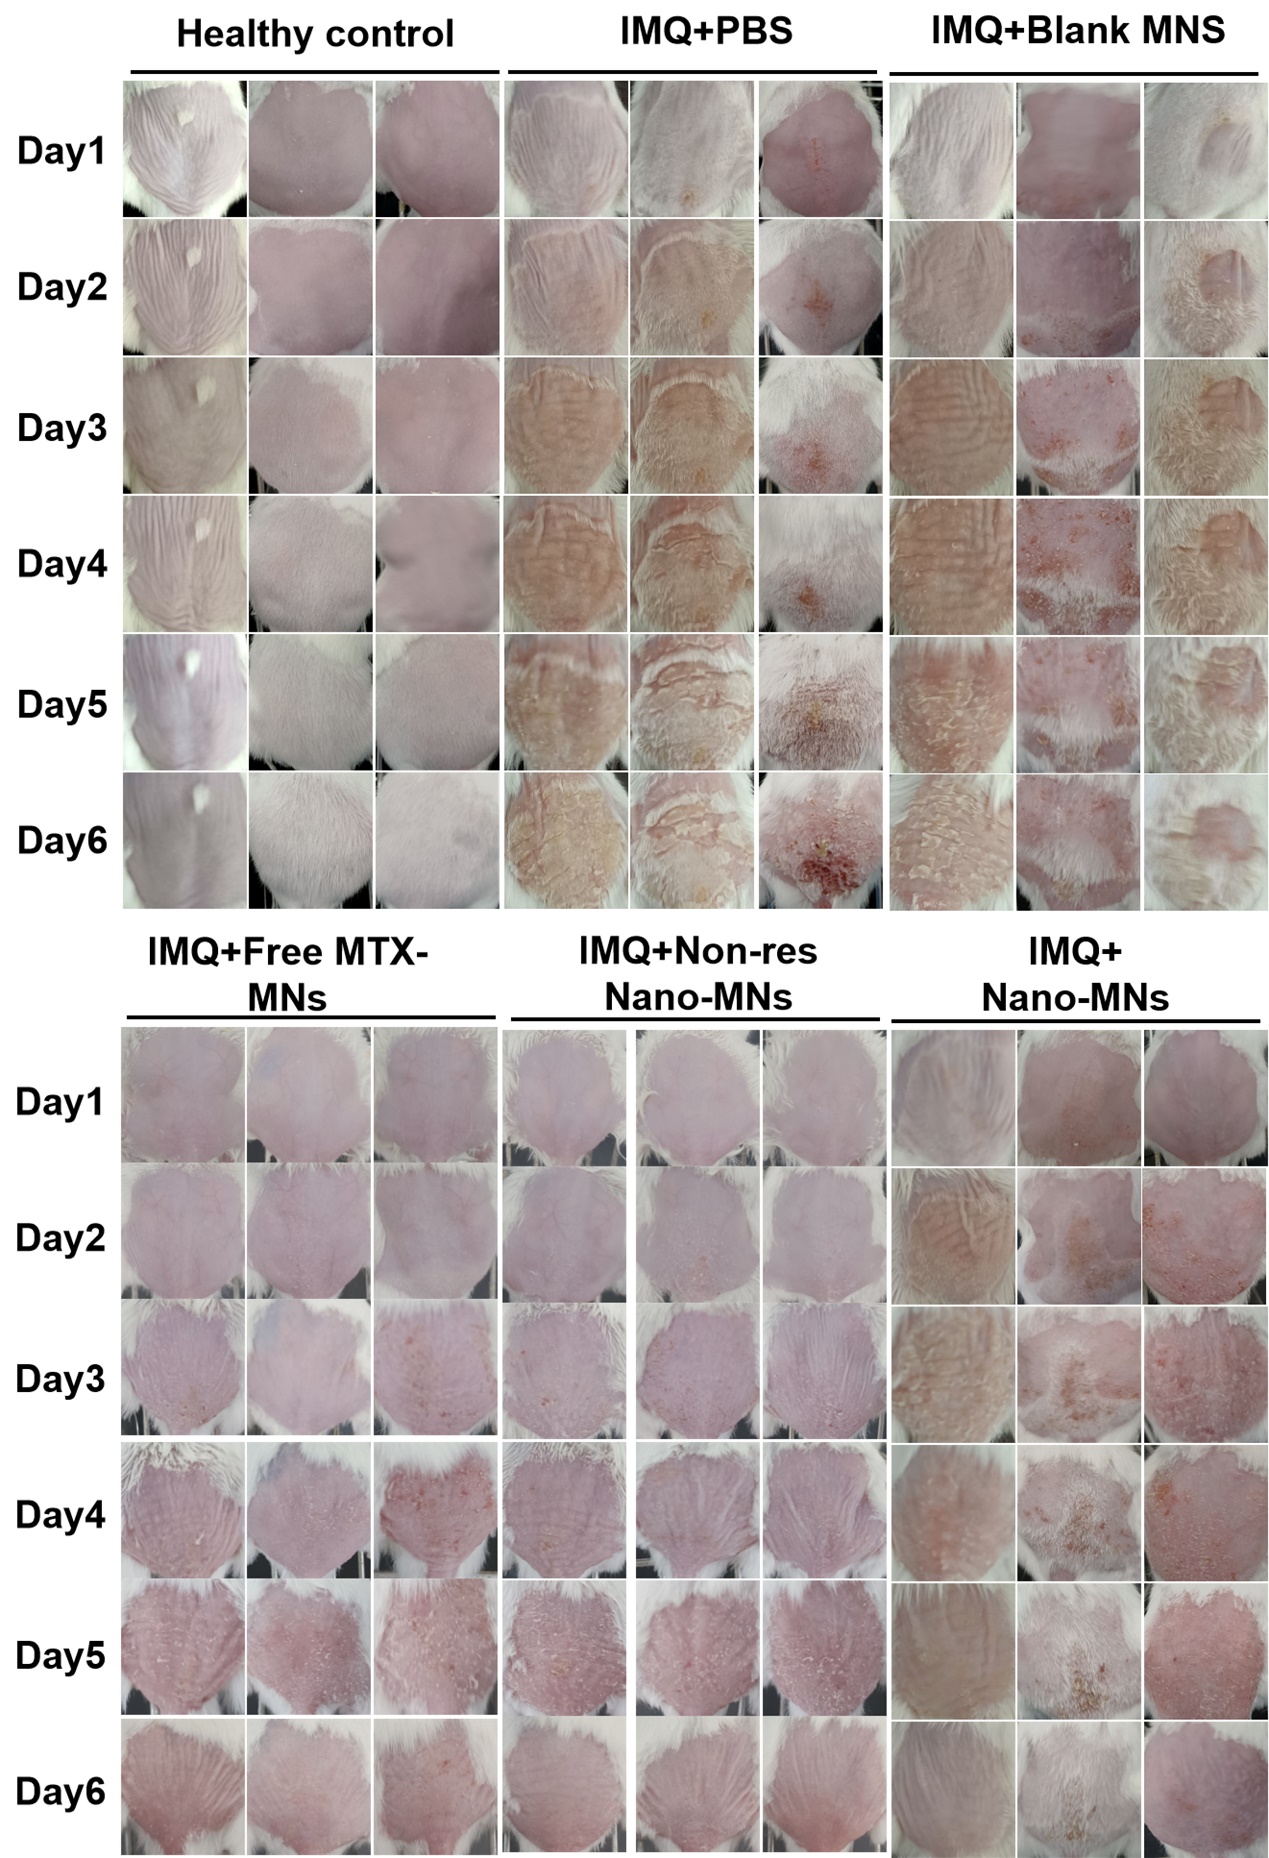


**Figure S7.** Photographs of the appearance for the imiquimod-induced psoriatic back skin from day 1 to day 6 (n=3).
